# Supplementary material
Source: Royal Society of Chemistry journal article supplement (doi:10.1039/d6ay00065g)
Supplement: d6ay00065g1.pdf [file d6ay00065g1.pdf]

## SUPPORTING INFORMATION

### Development of a rapid and sensitive single-tube RAA-CRISPR/Cas12a assay for monkeypox virus detection

Fan Yu<sup>a</sup>, Duo Zhang<sup>b</sup>, Chengcheng Peng<sup>a</sup>, Huiling Qin<sup>a</sup>, Fei Xu<sup>a</sup>, Yuyuan Zhang<sup>a</sup>, Zhicheng Pan<sup>a</sup>,  
Pengpeng Xiao<sup>a\*</sup>, Nan Li<sup>a\*</sup>

<sup>a</sup> Wenzhou Key Laboratory for Virology and Immunology, Institute of Virology, Wenzhou University, Wenzhou 325035, China.

<sup>b</sup> College of Veterinary Medicine, Jilin University, Changchun 130062, China.

\* Corresponding author.

E-mail: xiaopengpeng1010@126.com (Pengpeng Xiao), E-mail: 20190283@wzu.edu.cn (Nan Li)

#### Content:

Fig. S1 Screening of RAA reaction primers and conditions.

Fig. S2 Detection of simulated MPXV clinical samples by RAA-CRISPR/Cas12a fluorescence method.

Fig. S3 LFA detection of simulated MPXV clinical samples.

Fig. S4 PCR detection of simulated MPXV clinical samples.

Fig. S5 Sensitivity of PCR detection.

Table S1 Primers and fluorescent probes were used to report the molecular sequences.

Table S2 Comparison of the proposed MPXV single-tube RAA-CRISPR/Cas12a assay with representative CRISPR-based nucleic acid detection methods.

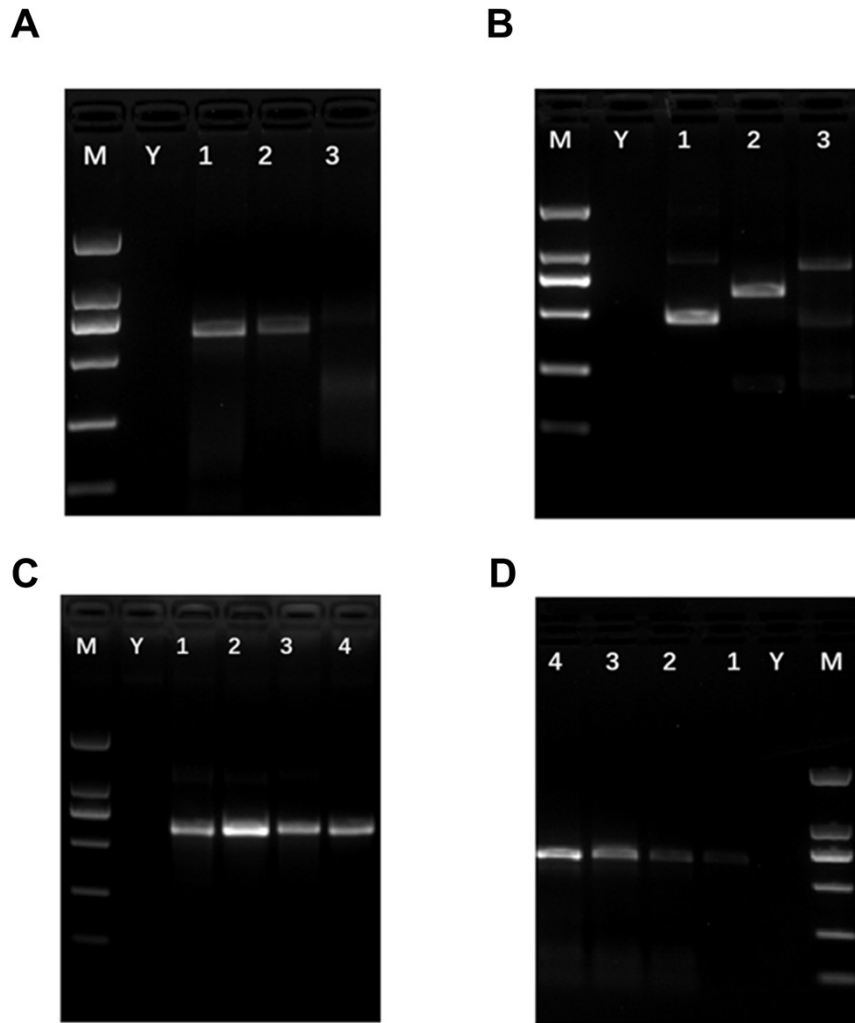

Fig. S1 Screening of RAA reaction primers and conditions. (A) Screening of RAA primers for the N4R gene. M: 2K Marker; Y: no template control; 1: F1+R1; 2: F2+R2; 3: F3+R3. (B) Screening of RAA primers for the L6R gene. M: 2K Marker; Y: no template control; 1: F1+R1; 2: F2+R2; 3: F3+R3. (C) Screening of the optimal primer reaction temperature for RAA of the N4R gene. M: 2K Marker; Y: no template control; 1: 34°C; 2: 37°C; 3: 40°C; 4: 43°C. (D) Screening of the optimal RAA primer reaction time for N4R gene. 4: 25min; 3: 20min; 2: 15min; 1: 10min. Y: no template control; M: 2K Marker.



**A**

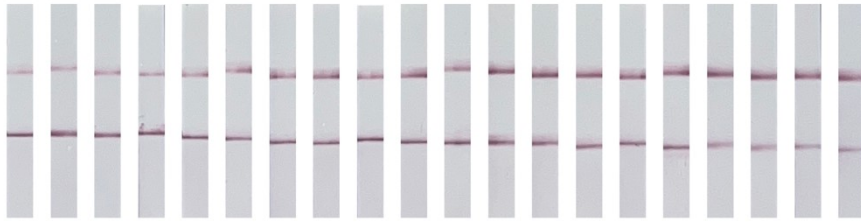

**B**

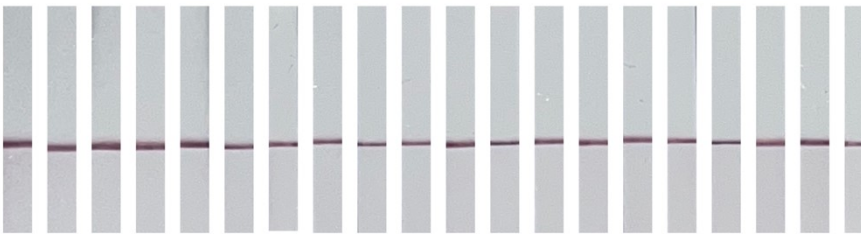

Fig. S3 LFA detection of simulated MPXV clinical samples. (A) Positive samples. (B) Negative samples.

**A**

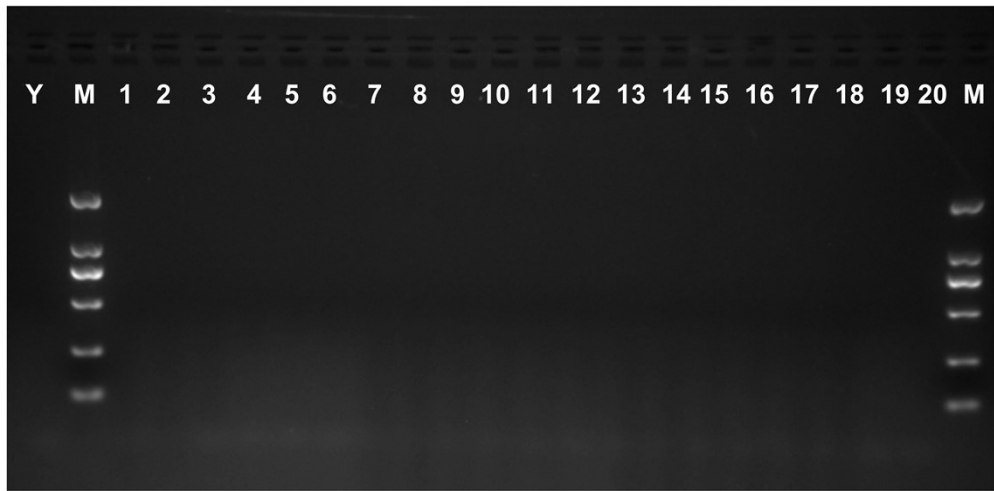

**B**

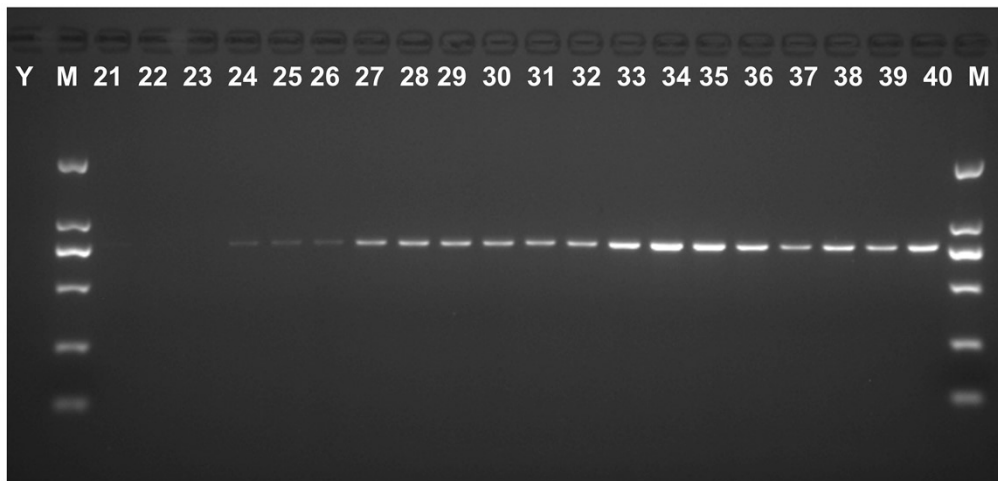

Fig. S4 PCR detection of simulated MPXV clinical samples. (A) Negative samples. (B) Positive samples. M: 2K marker; Y: no template control.; 1~20: negatives; 21~40: positives.

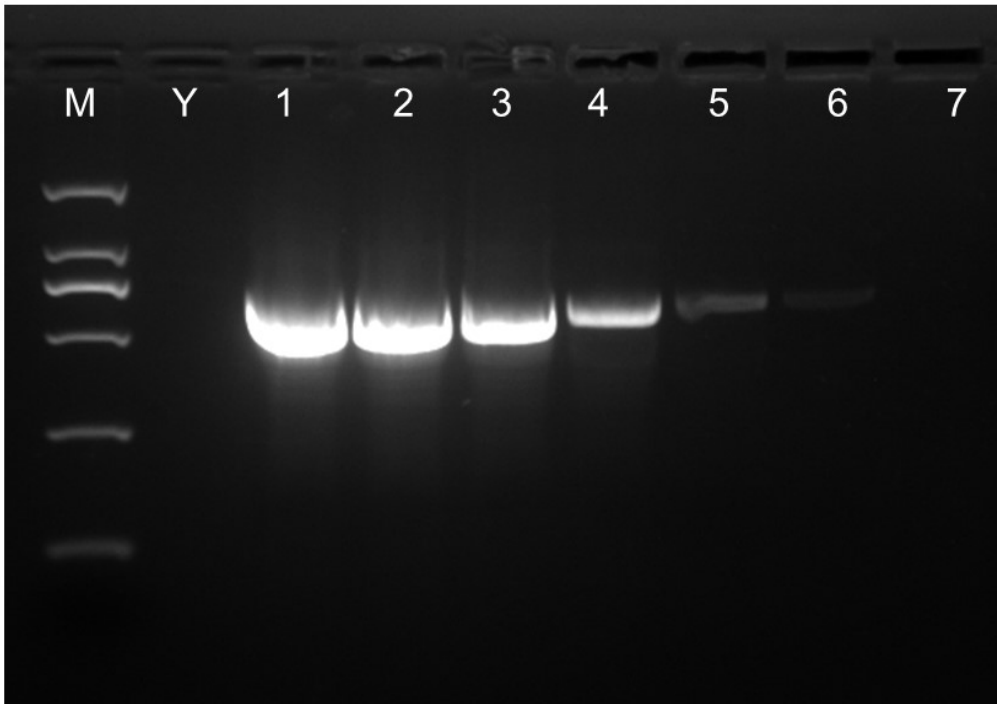

Fig. S5 Sensitivity of PCR detection. M: 2K Marker; Y: no template control; 1-7:  $10^8$  to  $10^2$  copies/ $\mu\text{L}$ .

Table S1 Primers and fluorescent probes were used to report the molecular sequences.

| <b>Primer Name</b> | <b>Sequences (5'–3')</b>                     |
|--------------------|----------------------------------------------|
| N4R-PCR-F          | CGATGAGCAGTTTCACGACG                         |
| N4R-PCR-R          | CCTACGGGCGATGACAGAT                          |
| L6R-PCR-F          | AAAGAGTTATCGGGACACGC                         |
| L6R-PCR-R          | GATTCAATTCCTCCGGTTCA                         |
| N4R-RAA-F1         | TTGATAGATTTCTCCTTGAACCAATTTGTGAT             |
| N4R-RAA-R1         | GTATATCCATTACTCATTACTGCGTTGACATT             |
| N4R-RAA-F2         | TATTTGATAGATTTCTCCTTGAACCAATTTGTGAT          |
| N4R-RAA-R2         | GTATATCCATTACTCATTACTGCGTTGACATT             |
| N4R-RAA-F3         | ATGGATTAGGTGTTGACTGTTATGTTCTAG               |
| N4R-RAA-R3         | TATATCCATTACTCATTACTGCGTTGACATT              |
| L6R-RAA-F1         | TTACTAAGATTCAATTCCTCCGGTTCAACG               |
| L6R-RAA-R1         | CCTATTGGAATTATTTCTGCACAGGTATTG               |
| L6R-RAA-F2         | CTTACTAAGATTCAATTCCTCCGGTTCAAC               |
| L6R-RAA-R2         | TGATGTGAGAGAGAAATACTTCTTTACGGT               |
| L6R-RAA-F3         | CTCCGTTGATTATTAGACCGGCTATTAGTT               |
| L6R-RAA-R3         | GAACTCTCTCCATATTTCCCAAGATGTT                 |
| N4R-crRNA1         | UAAUUUCUACUCUUGUAGAUCAUAUCCCCUAAAAUAGGCAUU   |
| N4R-crRNA2         | UAAUUUCUACUCUUGUAGAUAUCGCGCUAUCUAUGCAGGUUAUA |
| N4R-crRNA3         | UAAUUUCUACUCUUGUAGAUGGAUUCAUAGAGAUAAUAUUGAU  |
| N4R-crRNA4         | UAAUUUCUACUCUUGUAGAUAUCAUAUAUUAAGAAUUGUAA    |

|             |                                             |
|-------------|---------------------------------------------|
| N4R-crRNA5  | UAAUUUCUACUCUUGUAGAUUGGUAGAUCAUGGGGCUGUAAUA |
| L6R-crRNA1  | UAAUUUCUACUCUUGUAGAUGAAGAGUGAUGUCUGGAUU     |
| L6R-crRNA2  | UAAUUUCUACUCUUGUAGAUGAGAUAUCAUCGGAUACCAGA   |
| L6R-crRNA3  | UAAUUUCUACUCUUGUAGAUUGGAGUAUAUAUUCUUGACGCAU |
| L6R-crRNA4  | UAAUUUCUACUCUUGUAGAUUAAUUCUAAUUCUAGAAGGAUUA |
| L6R-crRNA5  | UAAUUUCUACUCUUGUAGAUGGUAGACAGUAAAUCUAAUUAU  |
| FQ-reporter | FAM-TTATT-BHQ1                              |
| FB-reporter | FAM-TTATT-Biotin                            |

---



Table S2 Comparison of the proposed MPXV single-tube RAA-CRISPR/Cas12a assay with representative CRISPR-based nucleic acid detection methods.

| Study      | Pathogen          | Sensitivity/Time                                                                  | Chemistry/format                                | Key advantage                                                                                                                      |
|------------|-------------------|-----------------------------------------------------------------------------------|-------------------------------------------------|------------------------------------------------------------------------------------------------------------------------------------|
| This study | MPXV              | 0.5 copies/ $\mu$ L, 35 min (Fluorescence); 5 copies/ $\mu$ L, 40 min (LFA)       | single-tube RAA-Cas12a                          | High sensitivity; reduced reagent cost; closed-tube format with lower contamination risk; reliable performance in complex matrices |
| 1          | MPXV              | 6.5 copies/ $\mu$ L, 40 min (Fluorescence)                                        | one-step LAMP-Cas12b                            | Clinical validation                                                                                                                |
| 2          | MPXV              | 1 copies/ $\mu$ L, 30 min (Fluorescence)                                          | single-tube RPA-Cas12a                          | Rapid detection                                                                                                                    |
| 3          | MPXV              | 10 copies/ $\mu$ L, 40 min (Fluorescence); $10^4$ copies/ $\mu$ L, 45 min (LFA)   | Two-step RAA+CRISPR                             | No thermal cycling required                                                                                                        |
| 4          | Feline Parvovirus | 4.277 copies/ $\mu$ L, 35 min (Fluorescence); 42.77 copies/ $\mu$ L, 55 min (LFS) | Two-tube, One-tube, and One-tube-LFS RAA-Cas12a | Clinical validation                                                                                                                |
| 5          | Pigeon Circovirus | 6.08 copies/ $\mu$ L, 30 min (Fluorescence)                                       | One-Step                                        | Clinical validation                                                                                                                |

## References

1. Guo J, Shan Y, Hu G, et al. *Viol. J.*, 2025, **22**, 151.
2. Zhao F, Hu Y, Fan Z, et al. *Cell Rep. Methods*, 2023, **3**, 100620.
3. Zhao F, Wang P, Wang H, et al. *Anal. Methods*, 2023, **15**, 2105.
4. Ge G, Chen Z, Liu S, et al. *Front. Vet. Sci.*, 2025, **12**.
5. Wang C, Tang M, Liu L, et al. *Vet. Sci.*, 2026, **13**(2), 206.
